# Supplementary material
Source: publisher figshare collection journal article supplement (https://acs.figshare.com/ndownloader/files/5132254)
Supplement: Supplementary file 1 [file 5132254]

## SUPPORTING INFORMATION

## Elemental Analysis

| Cmpd | Empirical Formula                                                      | Calculated |      |      | Found |      |      |
|------|------------------------------------------------------------------------|------------|------|------|-------|------|------|
|      |                                                                        | C          | H    | N    | C     | H    | N    |
| 1e   | C <sub>31</sub> H <sub>30</sub> N <sub>2</sub> O <sub>3</sub> •1.23TFA | 64.94      | 5.09 | 4.53 | 64.72 | 5.61 | 4.26 |
| 8    | C <sub>27</sub> H <sub>28</sub> N <sub>2</sub> O <sub>3</sub> •2.15TFA | 55.80      | 4.51 | 4.16 | 55.66 | 4.92 | 4.04 |

## High Resolution Mass Spectral Analysis

| Cmpd | Empirical Formula                                              | Calculated (M+H) <sup>+</sup> | Found    |
|------|----------------------------------------------------------------|-------------------------------|----------|
| 1a   | C <sub>26</sub> H <sub>21</sub> NO <sub>4</sub>                | 412.1549                      | 412.1559 |
| 1b   | C <sub>26</sub> H <sub>22</sub> N <sub>2</sub> O <sub>3</sub>  | 411.1709                      | 411.1729 |
| 1c   | C <sub>29</sub> H <sub>28</sub> N <sub>2</sub> O <sub>3</sub>  | 453.1578                      | 453.1559 |
| 1d   | C <sub>28</sub> H <sub>26</sub> N <sub>2</sub> O <sub>3</sub>  | 439.2022                      | 439.2004 |
| 1e   | C <sub>31</sub> H <sub>30</sub> N <sub>2</sub> O <sub>3</sub>  | 479.2335                      | 479.2333 |
| 1f   | C <sub>30</sub> H <sub>21</sub> NO <sub>4</sub>                | 460.1549                      | 460.1547 |
| 1g   | C <sub>27</sub> H <sub>20</sub> F <sub>3</sub> NO <sub>4</sub> | 480.1423                      | 480.1441 |
| 1h   | C <sub>26</sub> H <sub>21</sub> NO <sub>4</sub>                | 412.1549                      | 412.1571 |
| 8    | C <sub>27</sub> H <sub>28</sub> N <sub>2</sub> O <sub>3</sub>  | 429.2178                      | 429.2179 |

## Experimental Data for Compounds 1c-1h

*N*-Isopropyl 3-(4-[(2-ethyl-7-hydroxy-3-phenyl-4-quinolinyl)oxyphenyl])-2-propenoamide (1c). Compound 1c (0.0253 g, 56% yield from 5a; 98% purity) was prepared from *N*-isopropyl-

acrylamide (0.5 mmol) and **5a** (0.10 mmol) as described for compound **1b**:  $^1\text{H}$  NMR (300 MHz,  $\text{CD}_3\text{OD}$ ):  $\delta$  7.72 (d, 1H), 7.42 (m, 7H), 7.20 (m, 2H), 7.10 (m, 1H), 6.61 (d, 2H), 6.40 (d, 1H), 4.05 (m, 1H), 2.78 (q, 2H), 1.14 (m, 9H). LC/MS rt 4.19 min (Conditions I); MS ( $\text{M}+\text{H}$ ) $^+$  453.55.

***N,N*-Dimethyl 3-(4-[(2-ethyl-7-hydroxy-3-phenyl-4-quinolinyl)oxyphenyl])-2-propenoamide (1d)**. Compound **1d** (0.0174 g, 40% yield from **5a**; 96% purity) was prepared from *N,N*-dimethylacrylamide (0.5 mmol) and **5a** (0.10 mmol) as described for compound **1b**:  $^1\text{H}$  NMR (300 MHz,  $\text{CD}_3\text{OD}$ ):  $\delta$  7.77 (d, 1H), 7.38 (m, 7H), 7.20 (m, 2H), 7.13 (m, 1H), 6.95 (d, 1H), 6.64 (d, 2H), 3.20 (s, 3H), 3.04 (s, 3H), 2.80 (q, 2H), 1.15 (t, 3H). LC/MS rt 3.45 min (Conditions II); MS ( $\text{M}+\text{H}$ ) $^+$  439.52.

***N*-Piperidinyl 3-(4-[(2-ethyl-7-hydroxy-3-phenyl-4-quinolinyl)oxyphenyl])-2-propenoamide (1e)**. Compound **1e** (0.0268 g, 56% yield from **5a**; 96% purity) was prepared starting from *N*-piperidinylacrylamide (0.5 mmol) and **5a** (0.10 mmol) as described for **1b**:  $^1\text{H}$  NMR (300 MHz,  $\text{CD}_3\text{OD}$ ):  $\delta$  8.10 (d, 1H), 7.40 (m, 8H), 7.23 (m, 2H), 7.02 (d, 1H), 6.73 (d, 2H), 3.66 (m, 4H), 2.94 (q, 2H), 1.66 (m, 6H), 1.22 (t, 3H). LC/MS rt 3.77 min (Conditions I); MS ( $\text{M}+\text{H}$ ) $^+$  479.58.

**3-(4-[(7-Hydroxy-2-phenyl-3-phenyl-4-quinolinyl)oxyphenyl])-2-propenoic acid (1f)**. Compound **1f** (0.0446 g, 10% yield from **4a**; 98% purity) was prepared starting from diphenylzinc (1 mmol) and compound **4a** (0.98 mmol) as described for **5a**, , and then was carried forward as described for **1a**:  $^1\text{H}$  NMR (300 MHz,  $\text{DMSO}-d_6$ ):  $\delta$  7.62 (d, 1H), 7.45, (d, 2H), 7.28 (m, 10H), 6.87 (s, 2H), 6.74 (d, 2H), 6.66 (s, 1H), 6.30 (d, 1H). LC/MS rt 4.10 min (Conditions I); MS ( $\text{M}+\text{H}$ ) $^+$  460.51.

**3-(4-[(2-ethyl-7-hydroxy-3-(3-trifluoromethylphenyl)-4-quinolinyl)oxyphenyl])-2-propenoic acid (1g)**. Compound **1g** (0.0167 g, 6% yield from **2**; 99% purity) was prepared starting from diethyl 2-(3-trifluoromethylphenyl)malonate (4.5 mmol) and compound **2** (4.5 mmol) as described for **3a**, , and then was carried forward as described for **1a**:  $^1\text{H}$  NMR (300 MHz,  $\text{CD}_3\text{OD}$ ):  $\delta$  8.14 (d, 1H), 7.65 (d, 1H), 7.47 (m, 8H), 6.74 (d, 2H), 6.34 (d, 1H), 2.90 (q, 2H), 1.22 (t, 3H). LC/MS rt 3.93 min (Conditions I); MS ( $\text{M}+\text{H}$ ) $^+$  480.45.

**3-(3-[(2-Ethyl-7-hydroxy-3-phenyl-4-quinolinyl)oxyphenyl])-2-propenoic acid (1h)**. Compound **1h** (0.009 g, 18% yield from 3-bromophenol; 99% purity) was prepared starting from 3-bromophenol (0.8 mmol) as described for **5a**, and then was carried forward as described for **1a**:  $^1\text{H}$  NMR (300 MHz,  $\text{DMSO}-d_6$ ):  $\delta$  7.57 (d, 1H), 7.43 (d, 1H), 7.36 (m, 10H), 6.69 (d, 1H), 6.41 (d, 1H), 2.68 (q, 2H), 1.14 (t, 3H). LC/MS rt 3.43 min (Conditions I); MS ( $\text{M}+\text{H}$ ) $^+$  412.56.
